# Supplementary material for: Travelling and splitting of a wave of hedgehog expression involved in spider-head segmentation
Source: PubMed Central journal article supplement — Nat Commun. 2011 Oct 11;2:500–. doi: 10.1038/ncomms1510 (PMC3207210; doi:10.1038/ncomms1510), 2011-10-11
Supplement: ncomms1510-s1.pdf [file ncomms1510-s1.pdf]

Supplementary Information for

## **Waves of *hedgehog* gene expression undergo splitting during Spider Head Segmentation**

Masaki Kanayama<sup>1,2</sup>, Yasuko Akiyama-Oda<sup>1</sup>, Osamu Nishimura<sup>3,4</sup>, Hiroshi Tarui<sup>3,5</sup>, Kiyokazu Agata<sup>4</sup>, and Hiroki Oda<sup>1,2\*</sup>

<sup>1</sup>JT Biohistory Research Hall, 1-1 Murasaki-cho, Takatsuki, Osaka, 569-1125 Japan

<sup>2</sup>Department of Biological Sciences, Graduate School of Science, Osaka University

<sup>3</sup>Genome Resource and Analysis Subunit, Center for Developmental Biology, RIKEN,  
2-2-3 Minatojima-minamimachi, Chuo-ku, Kobe, Hyogo 650-0047, Japan

<sup>4</sup>Department of Biophysics & global COE, Graduate School of Science, Kyoto University,  
Kitashirakawa-Oiwake, Sakyo-ku, Kyoto 606-8502, Japan

<sup>5</sup>Present address: Omics Science Center, Yokohama Institute, RIKEN, 1-7-22  
Suehiro-cho, Tsurumi-ku, Yokohama, 230-0045 JAPAN

\*To whom correspondence should be addressed. E-mail: [hoda@brh.co.jp](mailto:hoda@brh.co.jp)

Supplementary Figures S1 to S8

Supplementary Tables S1 and S2

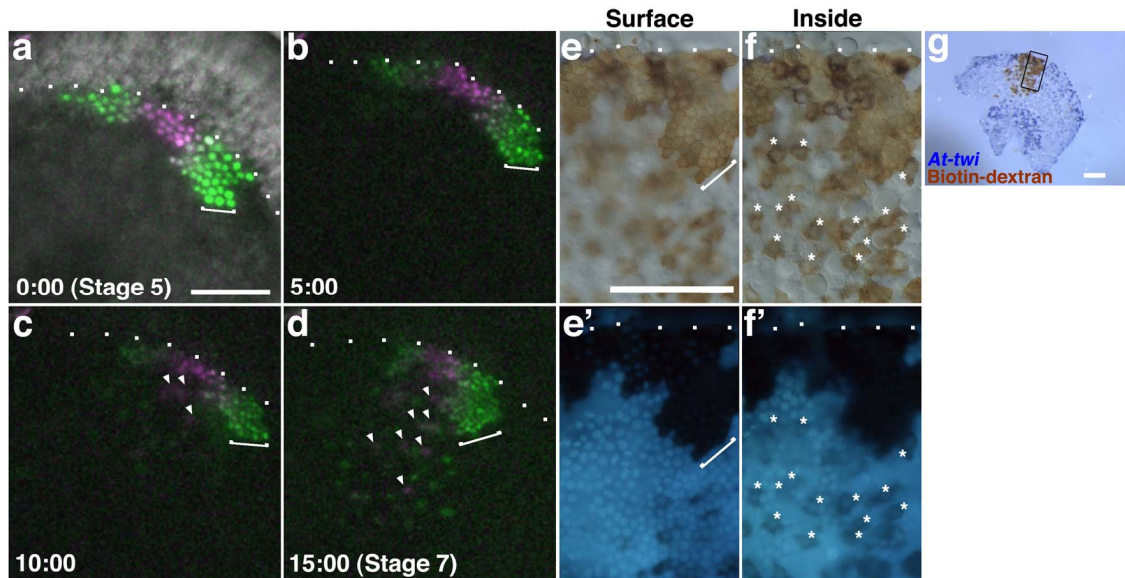

**Supplementary Figure S1: Internalization of cells from the rim of the germ disc.** (a-d) Projections of confocal images of a cell clone expressing NLS-tdEosFP at the rim of the germ disc (dotted) observed by time-lapse confocal microscopy. Images were collected at the time indicated (hr:min). The tdEosFP was photoconverted from the green (shown in green) to the red state (shown in purple) in a part of the cell clone before recording, which began at early stage 5. In a, a transmission image is merged to show the outline of the germ disc. Some of the cells labelled in purple were internalized (c, d, arrowheads). (e-g, e', f') A flat preparation of the observed embryo, which was fixed approximately 15 min after the images shown in d were collected and was stained for *At-twi* transcripts (purple), the lineage tracer biotin-dextran (brown), and DNA. e and f are differential interference contrast images of the boxed area in g; e' and f' are fluorescence images of e and f for DNA staining. The focal plane was adjusted to the surface cell layer in e and e' and to an inner cell layer in f and f'. Asterisks indicate labelled cells in which the *At-twi* transcripts were detectable. Cells indicated by brackets in a-e and e' are the same cell population that contributed to the surface ectoderm. Scale bars, 100  $\mu$ m.

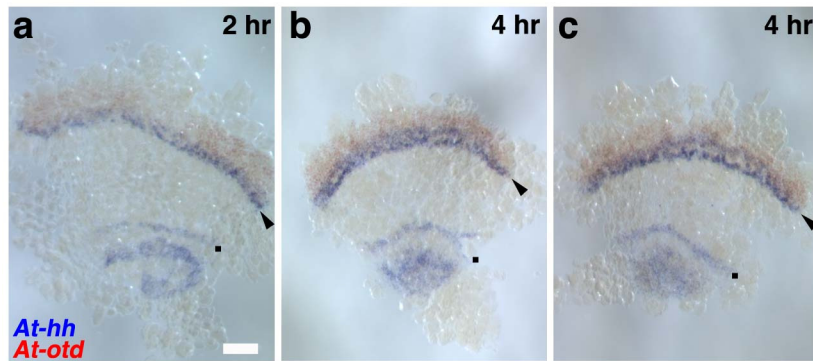

**Supplementary Figure S2: Examples of splitting *At-hh* stripes in the presumptive head ectoderm.** (a-c) Flat preparations of embryos double-stained for *At-hh* (purple) and *At-otd* (red) transcripts. These additional samples came from the experiments shown in Fig. 3. The embryo shown in **a** was fixed at the 2-hr time point, and those shown in **b** and **c** were fixed at the 4-hr time point. Arrowheads indicate the splitting of the *At-hh* stripe in the presumptive head ectoderm. Dots indicate the *At-hh* stripe corresponding to the L4 segment. Anterior is to the top. Scale bar, 100  $\mu$ m.

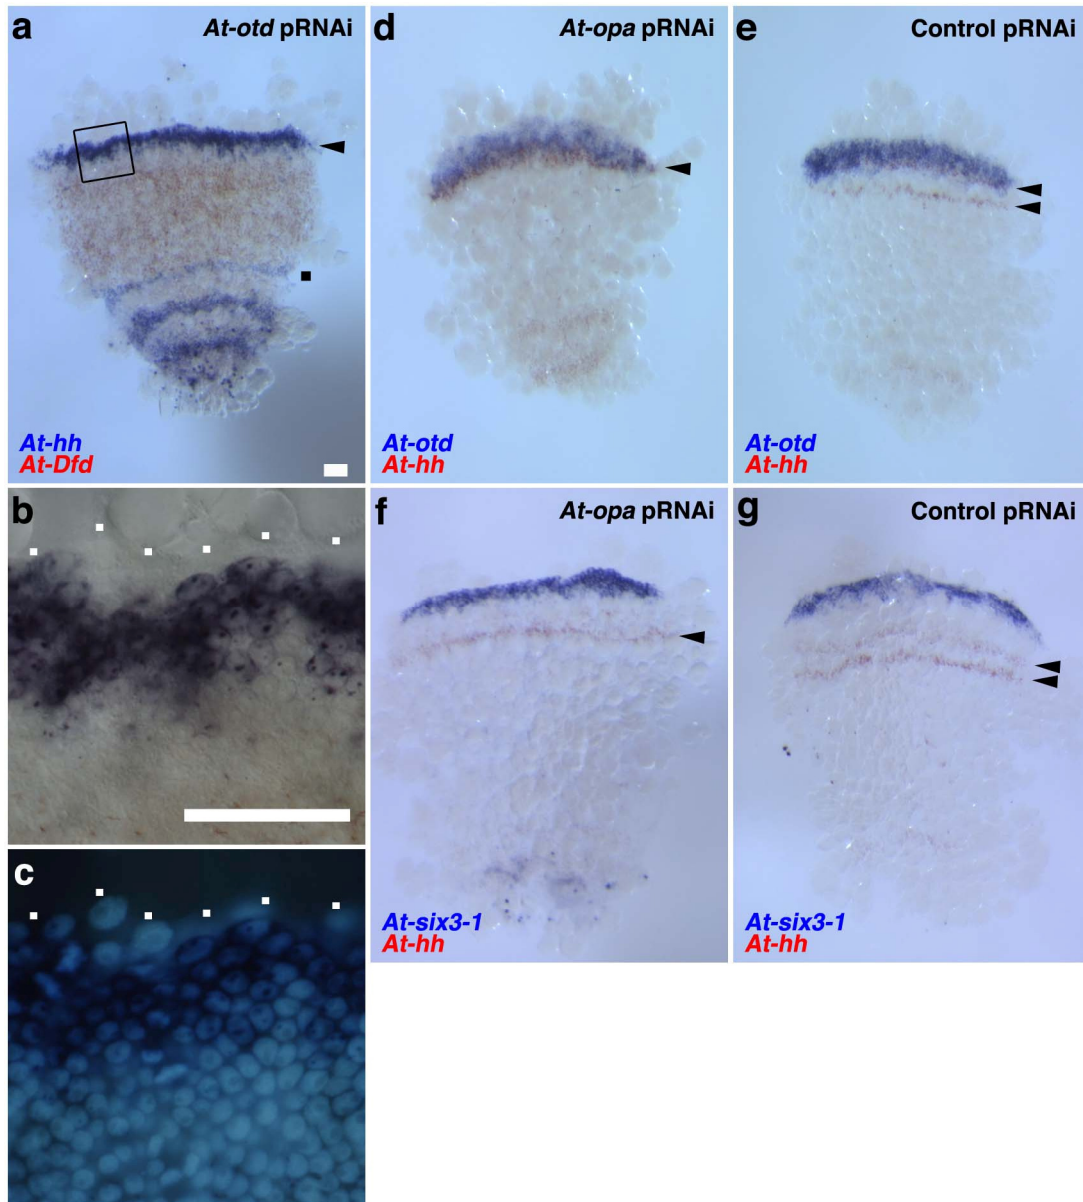

**Supplementary Figure S3: *At-opa* pRNAi does not disrupt anterior terminal patterning.** (a-c) Flat preparation of an *At-otd* pRNAi embryo at germ band-forming stage stained for *At-hh* (a, b, purple) and *At-Dfd* (a, b, red) transcripts and DNA (c). The area boxed in a is magnified in b and c. The *At-hh* stripe (arrowhead) persisted at the anterior margin of the nascent germ band (white dots). This embryo is approximately six hr older than the control embryo shown in Fig. 6c. The black dot indicates the *At-hh* stripe corresponding to the L4 segment. (d-g) Flat preparations of *At-opa* and control pRNAi embryos at germ band-forming stages stained for *At-hh* (red) and *At-otd* (d, e, purple) or *At-six3-1* (f, g, purple) transcripts. The *At-hh* stripes in the presumptive head ectoderm are indicated by arrowheads. Scale bars, 50  $\mu$ m.

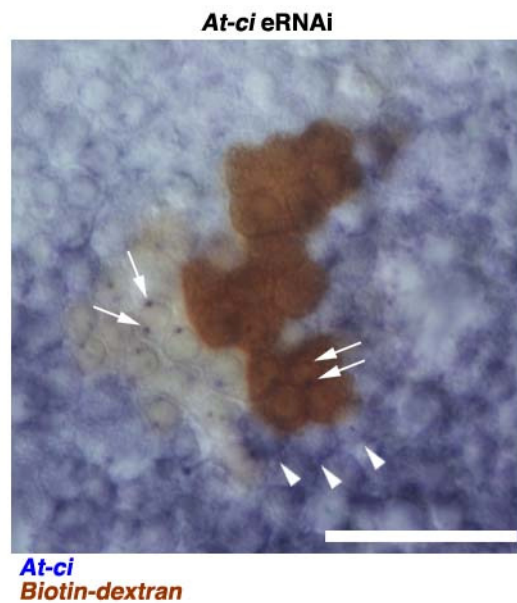

**Supplementary Figure S4: Cell-autonomous effects of eRNAi.** Part of a stage 5 embryo microinjected with *At-cil* dsRNA and stained for *At-ci* transcripts (purple) and the lineage tracer biotin-dextran (MW 10,000, brown). Note that cells in the labelled area can be grouped into two sub-populations based on the level of the brown signal. These two groups appear to reflect two descendant cell populations of sister cells of the first cell division after microinjection. Although the lineage tracer is inherited asymmetrically, *At-ci* transcripts are depleted from the cytoplasm in both cell populations but not in adjacent cells (arrowheads). Arrows point at paired dots of nuclear signals implying that the transcription is active. Scale bar, 50  $\mu$ m.

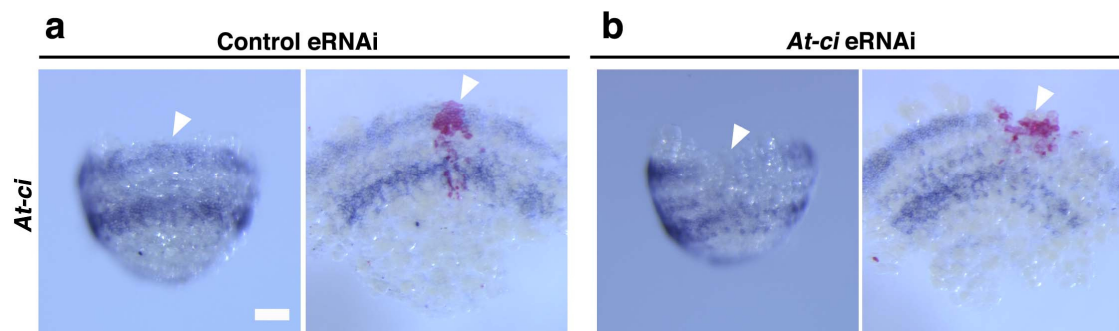

**Supplementary Figure S5: Validation of eRNAi against *At-ci*.** (a, b) Detection of *At-ci* transcripts in embryos microinjected with control *gfp* dsRNA (a) and *At-ci1* dsRNA (b). Each embryo was photographed before (left) and after (right) staining for the lineage tracer FITC-dextran (pink). Arrowheads indicate areas where the lineage tracer and presumably the dsRNAs were introduced. Specific reduction in the level of the signal for *At-ci* transcripts was observed in b, but not in a. Scale bar, 100  $\mu$ m.

**a**

**ZF1** **ZF2**

```

* * * * *
At-Opa CLWIDPDQ----MPPKKPCNKI FQTMHEIVSHIAVEHVGGPECTN-HTCCWQECPRNGRPFKAKYKLVNHIRVHTGKPPFPCPF
Dm-Opa .....PGLVPPGGR.T...V.HS.....T.LT.....T-..A.F.VG.S.....A..H
Bf-Zic .....PE.....S.S.....T.VT.....A.F.KD..D..A.....
Hr-ZicN .K..VSGKS---GEENAIT.DRE.YS.NQL.D.VT.D....HDQAD...Y.KD.T.E-KS.Q.....I..L.
Mm-Zic1 .K..E.E.E---LAN...S...T.S...L.T.VT.....QS...I.F.E...E.K.....
Xl-Zic1 .K..E.E.E---LAN...S...T.S...L.T.VT.....QS...I.V.E...E.K.....I.....
Dr-Zic1 .K..E.E.E---LTN...S...T.S...L.T.LT.....QS...I.F.E.G.E.K.....
At-Ci .H.....S.G.E.M.QE.L.Q..NKD.IQ.SRK.S-FV.R.KD.S.EEK...Q.M..V.M.R.....NK.T.
Dm-Ci .H.....RS.R.IE.I.QD.L.K..NND.IQNKKA--FV.R.ED.T.GEK...Q.M..V.M.R.....HK.T.
Tc-Ci .H.....D.GTE...QD.L.K..NND.IHANKKS--FV.R.DG.S.AEK...Q.M..V.M.R.....HK.T.
Bf-Gli .H.DG-----S.E.D.QDQL.H..NND.IH.EKKE--FV.R.S..T.EQK...Q.M..V.M.R.....HK.T.
Mm-Gli .R.DG-----SQE.DSQEQL.H..NS..IH.ERKE--SV.H.GG.S.EL...Q.M..V.M.R.....HK.T.
Xl-Gli2 .H.DG-----S.E.D.QDQL.H..NND.IH.EKKE--FV.R...S.EQK...Q.M..V.M.R.....HK.T.
Dr-Gli1 .H.ES-----S.E.D.QEQL.H..NN..IH.EKKE--FV.H.KD.S.EQ...Q.M..V.M.R.....HK.T.
Dm-Lmd .R.TG-----DEE.PHQQAF.E..EKC.DVRKGED-FS.F.LD..RYK..N.R...LI.M..S...NK..M.
Dm-Sug .N.T-----DRV.D.LDALAQ.VTQR.AIASLTDGLYY.R.R.G.Q.SE.G.N.R..MLV.T.T..K...HR..
Mm-GLIS1 .R.V-----CAAYEQQE.L.R..EKS.IDQRKGED-F..F.AG.V.RYK..N.R...LI.M..S...NK.M.
Dr-GLIS3 .C.LH-----GA.YSHRDAL.K..EQI..DQRKGED-F..F.AG.A.KHK..N.R...LI.M..S...NK.S.
Dm-Snail .....DE.Q.MYS.SMGLSK.-RQF.CPAA..N--QEKKTHS.EEC.KLYTTIGA.KM...T.....L..KC
At-Snail .....SA.S.NYA.YSGLSR.-KQF.CITL.K-----KAFN.KYCDKIYVSLGA.KM...T.....L..KC

```

**ZF3** **ZF4** **ZF5**

```

* * * * *
At-Opa PGCCKVFARSENLIKHKRTHTGKPPFKCEYAGCDRKFANS.SDRKKHS-HVHTSDKPYNCKIRGCDKSYTHPSLKRKHMK--VHG
Dm-Opa .....HE.....R.....R.N.....
Bf-Zic .....L.....FE.....R.....V.....
Hr-ZicN .N.....V.PFD...R.....T-YT.STS..A..VQ..K.....L--M.E
Mm-Zic1 .....FE.....R.....M.....L.M--.....E
Xl-Zic1 .....FE.....R.....M.....L.M--.....E
Dr-Zic1 .....FE.....R.....M.....L.M--.....E
At-Ci .E.S.AYS.L...T.L.S...YT.FP.SKA.S.A..A..QNRT.SNT..A..AP.T.R.D...V.T...
Dm-Ci .E.F.AYS.L...T.L.S...YT.P.SKA.S.A..A..QNRT.SNE..I..AP.T.R.D...V.T...
Tc-Ci .E.V.AYS.L...T.L.S...YT.P.SKA.S.A..A..QNRT.SNE..V..AP.T.R.D...V.T...
Bf-Gli .E.N.AYS.L...T.L.S...YV.HE.NKA.S.A..A..QNRT.SNA..V..P.T.R.D...V.T...
Mm-Gli .E.R.SYS.L...T.L.S...YM.QE.SKA.S.A..A..QNRT.SNE..V..LP.T.R.D...V.T...
Xl-Gli2 .E.F.AYS.L...T.L.S...YV.HE.NKA.S.A..A..QNRT.SNE..I..P.T.R.D...V.T...
Dr-Gli1 .E.N.AYS.L...T.L.S...YV.HE.NKA.S.A..A..QNRT.SNE..I..P.T.R.D...V.T...
Dm-Lmd .N.A.S.L...Q.S...R.YG.Q.K.LKA.S...A..Q-RT.YDT..A.QLP.T.R.D...V.N--A
Dm-Sug .H.L.E.S.S.A...I.S.S...Y.SFE.QKAYS...F..T-RT.SME..M.VA.Q.R.D...V.TFK.S
Mm-GLIS1 .E.S.A.S.L...L.S...YL.QHP.QKA.S...A..Q-RT.LDT..A.Q.P.S.R.D...V--A.S
Dr-GLIS3 .E.Q.A.S.L...L.S...YV.PHP.LKA.S...A..Q-RT.VDT..A.Q.Q.G.R.D...V.S--S
Dm-Snail .I...A.S.PWL.QG.I...Q.P--D.P.S..DR.NLRA.Q-QT.VDV.K.A.QV--H..FSRM.L.N..SSSNCTI
At-Snail .NL...A.S.PWL.QG.I...A.P--H.S.A..DR.NLRA.L-QT.SDV.K.S.NA--S.TFSRM.L.L..NDGGCGA

```

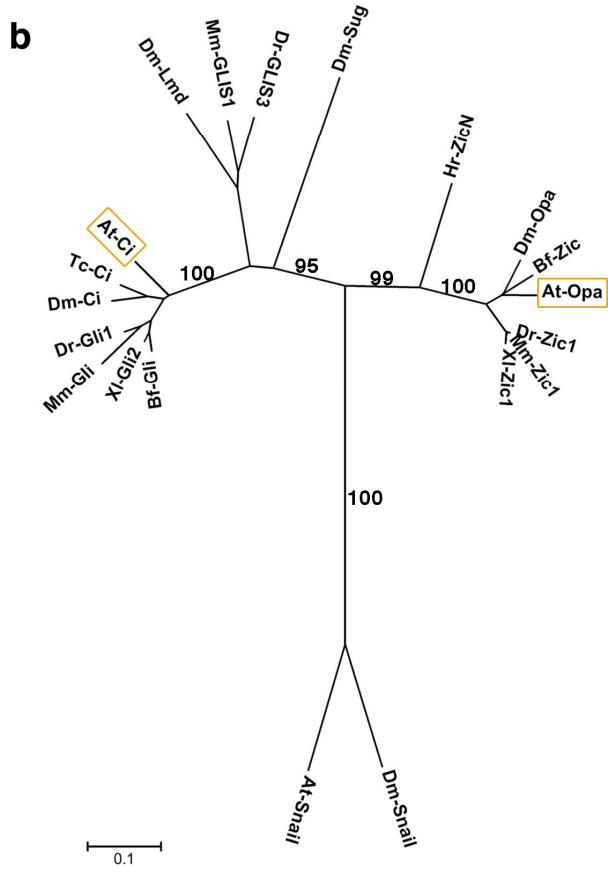

**Supplementary Figure S6. Molecular characterization of At-Opa and At-Ci. (a)**

Alignment of the amino acid sequences of five zinc finger domains, ZF1-5, of the Opa/Zic, Ci/Gli, Glis and Snail family proteins. Residues that are conserved with the At-Opa protein are shown in dots. Gaps that were introduced to optimize the alignment are indicated by dashes. Asterisks indicate the conserved Cys and His residues among the proteins. **(b)** Neighbour-joining tree constructed based on the alignment shown in **a**. The numbers at the internal branches are bootstrap values (%). The accession numbers of the proteins are as follows: At-Opa, AB605264; Dm-Opa, NP\_524228.2; Bf-Zic, AB231866.1; Hr-ZicN BAC23063.1; Mm-Zic1, AAH60247.1; Xl-Zic1, BAA33406.1; Dr-Zic1, NP\_571008.1; At-Ci, AB605263; Dm-Ci, AAF59373.2; Tc-Ci, EFA01291.1; Bf-Gli, CAB96572.1; Mm-Gli, AAC09169.1; Xl-Gli2, AAD28180.1; Dr-Gli1, NP\_840081.1; Dm-Lmd, AAN13923.1; Dm-Sug, AAF58441.1; Mm-GLIS1, CAM23304.1; Dr-GLIS3, AAI29174.1; Dm-Snail, AAF53463.1; At-Snail, BAD44735.1. Species abbreviations are as follows: At, *Achaearanea tepidariorum*; Bf, *Branchiostoma floridae*; Dm, *Drosophila melanogaster*; Dr, *Danio rerio*; Hr, *Halocynthia roretzi*; Mm, *Mus musculus*; Tc, *Tribolium castaneum*; Xl, *Xenopus laevis*.



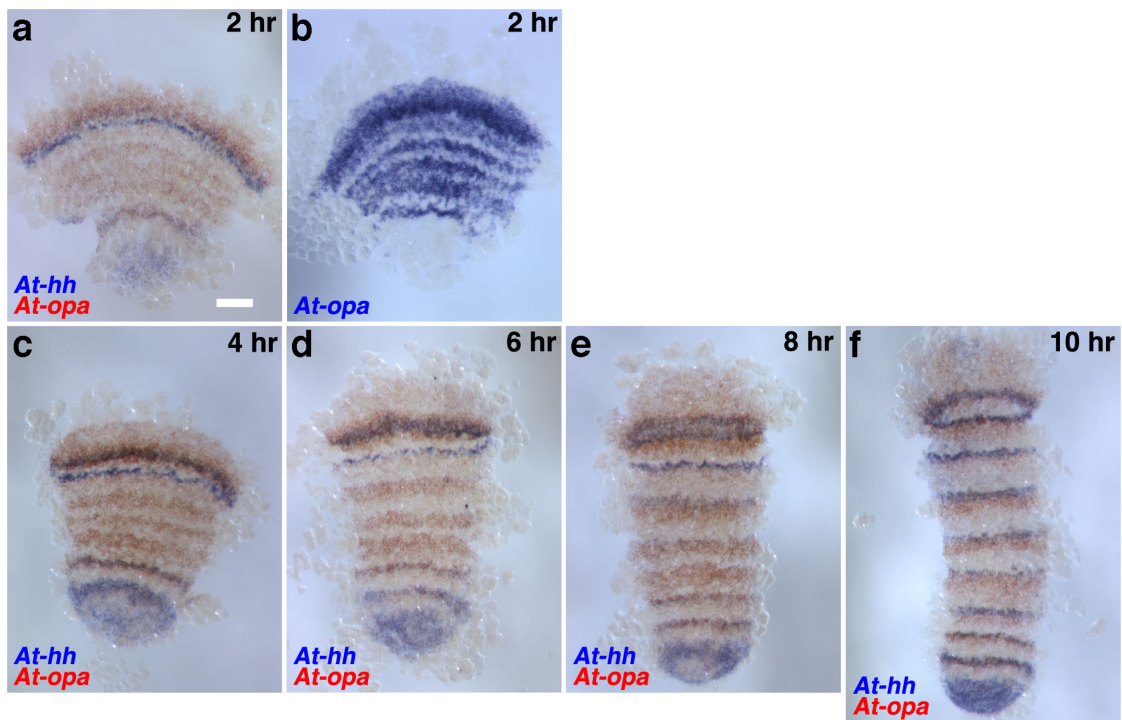

**Supplementary Figure S7: Expression patterns of *At-opa* transcripts.** (a-f) Flat preparations of embryos double-stained for *At-hh* (purple) and *At-opa* (red) transcripts (a, c-f) or single-stained for *At-opa* (b). These samples came from the pools of fixed embryos used in Fig. 3. The time points at which embryos were fixed are indicated. Scale bar, 100  $\mu\text{m}$ .

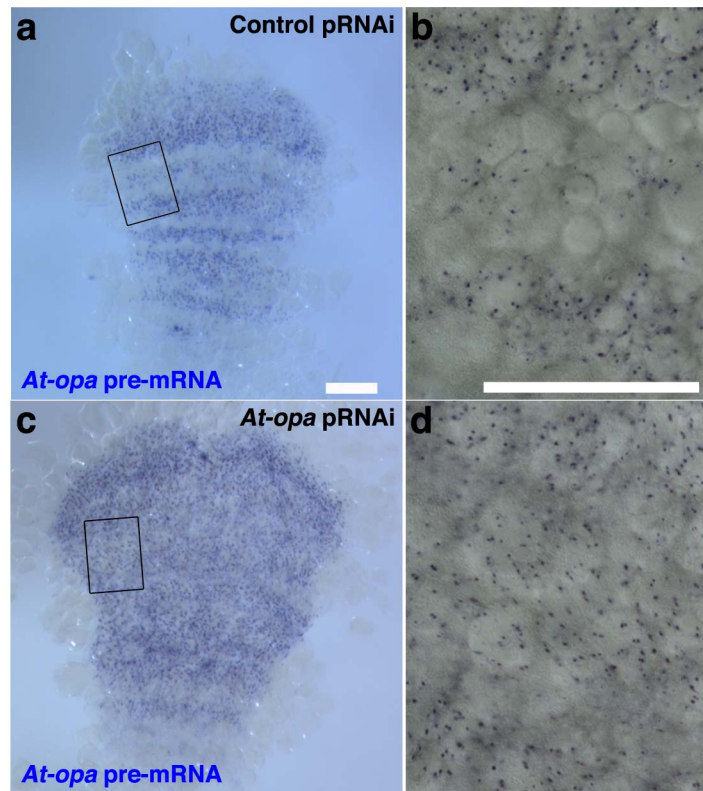

**Supplementary Figure S8: *At-opa* pRNAi disrupts the striped pattern of *At-opa* transcription.** (a-d) In situ hybridization of *At-opa* pre-mRNA in control (a, b) and *At-opa* pRNAi (c, d) embryos with an intron probe. The areas boxed in a and c are magnified in b and d, respectively. Dots of nuclear signals were detected in most (but not all) cells of the surface ectoderm in the *At-opa* pRNAi embryo, with no clear striped pattern being evident. Scale bars, 100  $\mu$ m.

## Supplementary Table S1

### dsRNAs and methods to validate reduction of target transcripts

| dsRNA            | region in cDNA       | experiment   | method for validation* |
|------------------|----------------------|--------------|------------------------|
| <i>At-otd1</i>   | nt 1-1190            | pRNAi        | 1                      |
| <i>At-otdXSE</i> | nt 1-480             | eRNAi        | 2                      |
| <i>At-otdXE</i>  | nt 481-1190          | pRNAi, eRNAi | 1, 2, 3                |
| <i>At-opa1</i>   | nt 83-1898           | pRNAi        | 1                      |
| <i>At-opaF</i>   | nt 83-547            | pRNAi, eRNAi | 1, 2, 3                |
| <i>At-opaH</i>   | nt 1020-1898         | pRNAi, eRNAi | 1, 2, 3                |
| <i>At-ci1</i>    | nt 580-1346          | eRNAi        | 2                      |
| <i>At-ci2</i>    | nt 1343-2480         | eRNAi        | 2                      |
| <i>At-hh1</i>    | nt 1-1020            | pRNAi        | 1, 3**                 |
| <i>At-hh2</i>    | nt 1017-1940         | pRNAi        | 1**                    |
| <i>gfp***</i>    | nt 979-1698 (pQBI25) | pRNAi, eRNAi | 1, 2, 3                |

\*1, in situ hybridization for pRNAi; 2, in situ hybridization for eRNAi; 3, Quantitative RT-PCR for pRNAi. \*\*For detail, see ref. 27. \*\*\*Used as control.

## Supplementary Table S2

### Summary of a microarray-based screen for genes down-regulated in *At-hh* pRNAi embryos

| Array No.                                                           | REF_ ID | [ <i>At-hh</i> pRNAi] / [normal] | EST clone ID or gene name | Accession No. | Top hit in BLASTX search with <i>Drosophila melanogaster</i> proteins (comments) |
|---------------------------------------------------------------------|---------|----------------------------------|---------------------------|---------------|----------------------------------------------------------------------------------|
| <b>Spots in which the signal intensity ratio was lower than 0.5</b> |         |                                  |                           |               |                                                                                  |
| 1                                                                   | 6820    | 0.417279                         | At_eW_008_H09             | FY219229      | reflNP_001104348.1  rolled, isoform F                                            |
| 1                                                                   | 11491   | 0.47383                          | At_eW_012_M09             | FY220493      | reflNP_524071.2  dally-like, isoform A                                           |
| 1                                                                   | 10627   | 0.419288                         | At_eW_018_C03             | FY221871      | (3' untranslated region of <i>At-patched</i> mRNA[AB433900])                     |
| 1                                                                   | 11579   | 0.416804                         | At_eW_019_D19             | FY222272      | reflNP_511057.1  spaghetti squash                                                |
| 1                                                                   | 6991    | 0.403571                         | At_eW_021_C06             | FY222963      |                                                                                  |
| 1                                                                   | 5807    | 0.48493                          | At_eW_022_E14             | FY223390      | gblADK20123.1  eater                                                             |
| 1                                                                   | 10269   | 0.39045                          | At_eW_022_J19             | FY223508      |                                                                                  |
| 1                                                                   | 140     | 0.491324                         | At_eW_024_O04             | FY224339      |                                                                                  |
| 1                                                                   | 9011    | 0.450229                         | At_eW_025_F13             | FY224510      |                                                                                  |
| 1                                                                   | 8275    | 0.494544                         | At_eW_025_G01             | FY224522      |                                                                                  |
| 1                                                                   | 5244    | 0.401155                         | eS6_d1_08_C03             | FY372343      |                                                                                  |
| 1                                                                   | 10904   | 0.477473                         | eS6_d1_08_C03             | FY372343      |                                                                                  |
| 1                                                                   | 12457   | 0.36501                          | eS6_d1_23_H04             | FY373674      |                                                                                  |
| 2                                                                   | 8324    | 0.346165                         | eS6_d1_33_F05             | FY374464      |                                                                                  |
| 2                                                                   | 11332   | 0.476639                         | eS6_d1_33_F05             | FY374464      |                                                                                  |
| 2                                                                   | 9755    | 0.499719                         | eS6_d1_46_B01             | FY375479      |                                                                                  |
| 2                                                                   | 5663    | 0.327032                         | eS6_d1_54_H12             | FY376203      | reflNP_524228.2  odd paired (clustered with At_eW_022_A24)                       |
| 2                                                                   | 3615    | 0.482977                         | eS7_003_H01               | FY376814      |                                                                                  |
| 2                                                                   | 1644    | 0.176031                         | eS7_SB_031_C08            | FY380182      | reflNP_524228.2  odd paired (clustered with At_eW_022_A24)                       |
| 2                                                                   | 8681    | 0.201762                         | eS7_SB_031_C08            | FY380182      | reflNP_524228.2  odd paired (clustered with At_eW_022_A24)                       |
| 2                                                                   | 501     | 0.335239                         | eS7_SB_042_E09            | FY381074      |                                                                                  |
| 2                                                                   | 10252   | 0.406792                         | eS7_SB_042_E09            | FY381074      |                                                                                  |
| 2                                                                   | 11471   | 0.351495                         | eS7_SB_042_E12            | FY381077      |                                                                                  |
| 2                                                                   | 7029    | 0.435581                         | S7_d1_02_D06              | FY368355      | reflNP_524071.2  dally-like, isoform A                                           |
| <b>Positive controls</b>                                            |         |                                  |                           |               |                                                                                  |
| 1                                                                   | 3800    | 0.155415                         | <i>At-hedgehog</i>        | AB125742      | reflNP_524459.2  hedgehog, isoform A                                             |
| 1                                                                   | 11894   | 0.452442                         | <i>At-hedgehog</i>        | AB125742      | reflNP_524459.2  hedgehog, isoform A                                             |
| 2                                                                   | 6843    | 0.134035                         | <i>At-hedgehog</i>        | AB125742      | reflNP_524459.2  hedgehog, isoform A                                             |
| 1                                                                   | 1079    | 0.179233                         | <i>At-orthodenticle</i>   | AB096074      | emblCAA41732.1  orthodenticle                                                    |
| 1                                                                   | 6105    | 0.26431                          | <i>At-orthodenticle</i>   | AB096074      | emblCAA41732.1  orthodenticle                                                    |
| 2                                                                   | 3062    | 0.217181                         | <i>At-orthodenticle</i>   | AB096074      | emblCAA41732.1  orthodenticle                                                    |
| <b>Negative controls</b>                                            |         |                                  |                           |               |                                                                                  |
| 1                                                                   | 6978    | 0.851721                         | At_eW_003_D02             | FY217447      | reflNP_524219.1  alpha catenin                                                   |
| 1                                                                   | 7997    | 0.766973                         | At_eW_003_D02             | FY217447      | reflNP_524219.1  alpha catenin                                                   |
| 1                                                                   | 9278    | 0.943404                         | At_eW_003_D02             | FY217447      | reflNP_524219.1  alpha catenin                                                   |
| 1                                                                   | 11582   | 0.896976                         | At_eW_003_D02             | FY217447      | reflNP_524219.1  alpha catenin                                                   |
| 2                                                                   | 6342    | 0.79843                          | At_eW_003_D02             | FY217447      | reflNP_524219.1  alpha catenin                                                   |
| 2                                                                   | 11607   | 1.031567                         | At_eW_003_D02             | FY217447      | reflNP_524219.1  alpha catenin                                                   |
| 1                                                                   | 4354    | 1.131876                         | eS7_003_G08               | FY376809      | reflNP_477375.1  elongation factor 1alpha48D, isoform A                          |
| 1                                                                   | 10730   | 1.34441                          | eS7_003_G08               | FY376809      | reflNP_477375.1  elongation factor 1alpha48D, isoform A                          |
| 2                                                                   | 430     | 1.512315                         | eS7_003_G08               | FY376809      | reflNP_477375.1  elongation factor 1alpha48D, isoform A                          |
| 1                                                                   | 3623    | 0.935976                         | eS7_SB_037_C01            | FY380578      | reflNP_511095.1  histone H3.3B, isoform A                                        |
| 1                                                                   | 9723    | 0.925602                         | eS7_SB_037_C01            | FY380578      | reflNP_511095.1  histone H3.3B, isoform A                                        |
| 2                                                                   | 6417    | 0.991825                         | eS7_SB_037_C01            | FY380578      | reflNP_511095.1  histone H3.3B, isoform A                                        |
